# Supplementary material
Source: ML conference proceedings conference paper supplement (https://openaccess.thecvf.com/content/ICCV2023/html/Yang_Semi-supervised_Speech-driven_3D_ICCV_2023_paper.html)
Supplement: Supplementary file 1 [file Yang_Semi-supervised_Speech-driven_3D_ICCV_2023_supplemental.pdf]

# Supplementary Material for Semi-supervised Speech-driven 3D Facial Animation via Cross-modal Encoding

Anonymous ICCV submission

Paper ID 1586

In this supplementary material, we describe details of the network architecture and the training process of our methods. Additionally, we discuss the limitations of our method and propose potential solutions. A supplementary video is also provided, which presents further qualitative comparisons, ablation studies, and visual results of our approach.

## 1. Network Architecture

**Speech Encoder.** The speech encoder consists of an audio feature extractor and a multi-layer transformer encoder. The audio feature extractor is initialized with pre-trained wav2vec2.0 [1] weights and generates audio features of dimension 1024. The structure of the multi-layer transformer encoder is adopted from [5], which consists of an input linear layer, a 3-layer transformer encoder, and an output linear layer. The self-attention and feed-forward layers have a hidden size of 512, and 4 attention heads are employed. The input linear layer converts the audio feature into 512-dimensional hidden embedding, while the output linear layer preserves the hidden dimension. The resulting speech encoding has a dimension of 512.

**Visual Encoder.** The shared visual encoder adopts Resnet34 [2] as the backbone, followed by an average pooling layer and a single fully connected layer. The resulting visual encoding has a dimension of 512.

**Decoder.** We borrow the decoder structure from [4], which consists of several upsampling blocks with an upsampling scale of 2. The details are depicted in Table 1.

## 2. Implementation Details

**Data Batch Organization.** In training phase, each batch of data contains speech, real facial images and synthetic facial images. Specifically, a batch is composed of 20 speech snippets, 20 real facial images, and 14 synthetic facial images, where the speech snippets and real facial images are synchronized. In addition, two neutral expression images are included, one is a real face and the other is a synthetic face.

**Training details.** We resize the facial images to 256x256

| Layer             | Activation | Output shape |
|-------------------|------------|--------------|
| Dense             | -          | 16384        |
| Reshape           | -          | 256x8x8      |
| Conv3x3 structure | LeakyReLU  | 512x8x8      |
| PixelShuffle      | -          | 2048x8x8     |
| Conv3x3           | LeakyReLU  | 512x16x16    |
| PixelShuffle      | -          | 2048x16x16   |
| Conv3x3           | LeakyReLU  | 512x32x32    |
| Conv3x3           | LeakyReLU  | 512x32x32    |
| Conv3x3           | LeakyReLU  | 512x32x32    |
| PixelShuffle      | -          | 1024x32x32   |
| Conv3x3           | LeakyReLU  | 256x64x64    |
| Conv3x3           | LeakyReLU  | 256x64x64    |
| Conv3x3           | LeakyReLU  | 256x64x64    |
| PixelShuffle      | -          | 512x64x64    |
| Conv3x3           | LeakyReLU  | 128x128x128  |
| Conv3x3           | LeakyReLU  | 128x128x128  |
| Conv3x3           | LeakyReLU  | 128x128x128  |
| Conv3x3           | LeakyReLU  | 256x128x128  |
| PixelShuffle      | -          | 64x256x256   |
| Conv3x3           | LeakyReLU  | 64x256x256   |
| Conv3x3           | LeakyReLU  | 64x256x256   |
| Conv1x1           | -          | 3x256x256    |

Table 1. Decoder architecture. Leaky ReLU activations use a slope of 0.1. Pairs of consecutive convolutions are composed as residual blocks [2].

and convert them to grayscale images. We use the Adam optimizer [3] with a learning rate of 1e-4. During training, the parameters of the audio feature extractor are fixed. The model is trained for 15000 steps. We evaluate our model using the last checkpoint.

## 3. Limitations and Solutions

The proposed network consists of only one real face decoder and one synthetic face decoder, which cannot achieve image-to-image translation for multiple identities. For example, generating animations for additional CG characters is infeasible. To overcome this limitation, we can extend

the network architecture to multiple decoders, with each decoder corresponding to a unique identity. It is worth noting that in order to train this multi-decoder network, images of multiple identities are required for training.

## References

- [1] Alexei Baevski, Yuhao Zhou, Abdelrahman Mohamed, and Michael Auli. wav2vec 2.0: A framework for self-supervised learning of speech representations. *Advances in neural information processing systems*, 33:12449–12460, 2020. 1
- [2] Kaiming He, Xiangyu Zhang, Shaoqing Ren, and Jian Sun. Deep residual learning for image recognition. In *Proceedings of the IEEE conference on computer vision and pattern recognition*, pages 770–778, 2016. 1
- [3] Diederik P Kingma and Jimmy Ba. Adam: A method for stochastic optimization. *arXiv preprint arXiv:1412.6980*, 2014. 1
- [4] Jacek Naruniec, Leonhard Helming, Christopher Schroers, and Romann M Weber. High-resolution neural face swapping for visual effects. In *Computer Graphics Forum*, volume 39, pages 173–184. Wiley Online Library, 2020. 1
- [5] Ashish Vaswani, Noam Shazeer, Niki Parmar, Jakob Uszkoreit, Llion Jones, Aidan N Gomez, Łukasz Kaiser, and Illia Polosukhin. Attention is all you need. *Advances in neural information processing systems*, 30, 2017. 1

162  
163  
164  
165  
166  
167  
168  
169  
170  
171  
172  
173  
174  
175  
176  
177  
178  
179  
180  
181  
182  
183  
184  
185  
186  
187  
188  
189  
190  
191  
192  
193  
194  
195  
196  
197  
198  
199  
200  
201  
202  
203  
204  
205  
206  
207  
208  
209  
210  
211  
212  
213  
214  
215
